# Supplementary material for: Evaluation of the ability of the Chinese stalagmite δ 18 O to record the variation in atmospheric circulation during the second half of the 20th century
Source: Copernicus journal article supplement (doi:10.5194/cp-10-975-2014), 2014-05-21
Supplement: Supplementary file 1 [file cp-10-975-2014-supplement.pdf]

Supplement of *Clim. Past*, 10, 975–985, 2014  
<http://www.clim-past.net/cp-10-975-2014/>  
doi:10.5194/cp-10-975-2014-supplement  
© Author(s) 2014. CC Attribution 3.0 License.

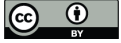

Climate  
of the Past

Open Access

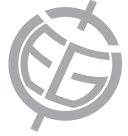

*Supplement of*

## **Evaluation of the ability of the Chinese stalagmite $\delta^{18}\text{O}$ to record the variation in atmospheric circulation during the second half of the 20th century**

**S. Nan et al.**

*Correspondence to:* S. Nan ([nansl@cams.cma.gov.cn](mailto:nansl@cams.cma.gov.cn)) and M. Tan ([tanming@mail.iggcas.ac.cn](mailto:tanming@mail.iggcas.ac.cn))

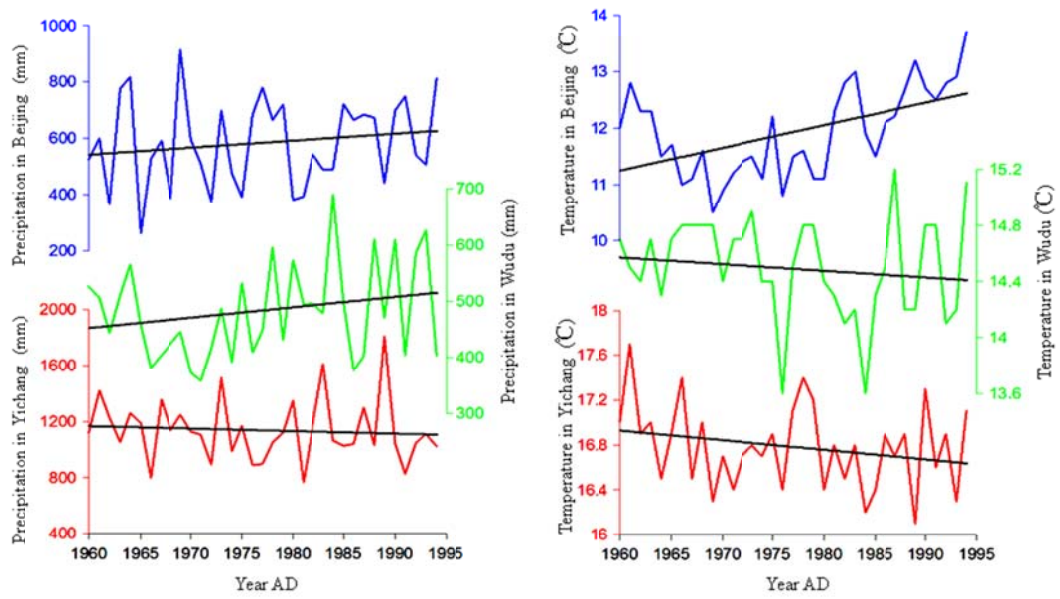

**Fig. S1.** A comparison among the time series of the annual temperature and precipitation for Beijing, Wudu and Yichang, which are the meteorological sites nearest to the series S312, WX42B and HS4, respectively.
